# Supplementary material for: The Associations between Knowledge and Behaviours Related to Touch Screens and Microbiological Threats among IT Students’
Source: MDPI journal article supplement (doi:10.3390/ijerph18179269), 2021-09-02
Supplement: s1 [file s1]

6 Jaka była wartość rynkowa nowego urządzenia (szacunkowo):

Wybierz ...

77 Czy dawałeś swój smartphone w ręce innej osoby: ?

nigdy  zdarza się często

78 Czy podałeś swój smartphone osobie wyraźnie spoconej: ?

nigdy  nie jest to problem

79 Czy podałeś swój smartphone osobie wyraźnie brudnej: ?

nigdy  nie jest to problem

80 Czy podałeś osobie kaszlącej lub katarem: ?

nigdy  nie jest to problem

81 Czy podałeś swój smartphone osobie z widocznymi zmianami skóry (przykładowo: przebarwienia, krosty, plamy, duże brodawki, wypryski, złuszczenia, rumienie, włókniaki): ?

nigdy  nie jest to problem

82 Czy zdarza się Tobie korzystać z cudzego smartphone'u: ?

nigdy  zdarza się często

83 Czy skorzystałbyś z cudzego smartphone'u który jest brudny: ?

nigdy  nie jest to problem

84 Czy skorzystałbyś z cudzego smartphone'u który jest mokry od potu: ?

nigdy  nie jest to problem

104 Czy na ekranach dotykowych są: ?

|          | zupelnie<br>ich nie<br>ma                                                           | <-                                                                                  | --                                                                                  | --                                                                                  | --                                                                                  | --                                                                                  | --                                                                                  | --                                                                                  | --                                                                                  | --                                                                                  | --                                                                                    | ->                                                                                    | tak i<br>jest ich<br>bardzo<br>duzo                                                   |
|----------|-------------------------------------------------------------------------------------|-------------------------------------------------------------------------------------|-------------------------------------------------------------------------------------|-------------------------------------------------------------------------------------|-------------------------------------------------------------------------------------|-------------------------------------------------------------------------------------|-------------------------------------------------------------------------------------|-------------------------------------------------------------------------------------|-------------------------------------------------------------------------------------|-------------------------------------------------------------------------------------|---------------------------------------------------------------------------------------|---------------------------------------------------------------------------------------|---------------------------------------------------------------------------------------|
| bakterie |  |  |  |  |  |  |  |  |  |  |  |  |  |
| wirusy   |  |  |  |  |  |  |  |  |  |  |  |  |  |
| grzyby   |  |  |  |  |  |  |  |  |  |  |  |  |  |
