# Supplementary material for: The Associations between Knowledge and Behaviours Related to Touch Screens and Microbiological Threats among IT Students’
Source: MDPI journal article supplement (doi:10.3390/ijerph18179269), 2021-09-02
Supplement: s1 [file s1]

A dark blue outline of a house, with the roofline forming a triangle above the text and a larger inverted triangle below it. The text "MDPI" is centered within the house shape.

**MDPI**
